# Supplementary material for: Structural characterization of the bacterial proteasome homolog BPH reveals a tetradecameric double-ring complex with unique inner cavity properties
Source: PubMed Central journal article supplement (PMC5777263; doi:10.1074/jbc.m117.815258), 2017-11-28
Supplement: 10.1074_M117.815258_jbc.M117.815258-1.pdf [file 10.1074_M117.815258_jbc.M117.815258-1.pdf]

**Structural characterization of the bacterial proteasome homolog BPH reveals a tetradecameric double-ring complex with unique inner cavity properties**

Adrian C. D. Fuchs<sup>1</sup>, Lorena Maldoner<sup>1</sup>, Katharina Hipp<sup>2</sup>, Marcus D. Hartmann<sup>1</sup> and Jörg Martin<sup>1</sup>

<sup>1</sup>From the Department of Protein Evolution and the <sup>2</sup>Electron microscopy facility of the Max Planck Institute for Developmental Biology, Spemannstraße 35, 72076 Tübingen, Germany

Supplemental material included:

Table S1

Figures S1-S6

|                                | Td-BPH SeMet                 | Td-BPH<br>P2 <sub>1</sub> 2 <sub>1</sub> 2 <sub>1</sub> | Td-BPH -<br>Epoxomicin       | Cm-BPH                       |
|--------------------------------|------------------------------|---------------------------------------------------------|------------------------------|------------------------------|
| <b>Data collection</b>         |                              |                                                         |                              |                              |
| Space group                    | P6 <sub>1</sub> 22           | P2 <sub>1</sub> 2 <sub>1</sub> 2 <sub>1</sub>           | P6 <sub>1</sub> 22           | P6                           |
| Cell dimensions a,<br>b, c (Å) | 197.3, 197.3, 297.2          | 79.1, 175.2,<br>205.9                                   | 196.8, 196.8,<br>296.4       | 96.5, 96.5,<br>75.9          |
| Wavelength (Å)                 | 0.978                        | 1.0                                                     | 1.0                          | 1.0                          |
| Resolution (Å)                 | 39.9 – 2.69 (2.86 –<br>2.69) | 39.6 – 2.30<br>(2.44 – 2.30)                            | 39.2 – 2.95<br>(3.12 – 2.95) | 37.9 – 2.10<br>(2.22 – 2.10) |
| <i>R</i> <sub>merge</sub>      | 29.0 (126.7)                 | 11.3 (83.1)                                             | 43.9 (198.1)                 | 14.4 (112.1)                 |
| <i>I</i> / $\sigma$ <i>I</i>   | 26.6 (6.16)                  | 11.7 (1.98)                                             | 13.6 (3.11)                  | 11.7 (2.03)                  |
| <i>CC</i> <sub>1/2</sub> (%)   | 99.9 (94.7)                  | 99.7 (70.4)                                             | 99.5 (87.8)                  | 99.7 (79.6)                  |
| Completeness (%)               | 99.8 (98.9)                  | 99.7 (98.7)                                             | 99.9 (100)                   | 99.8 (99.3)                  |
| Redundancy                     | 105.9 (97.7)                 | 5.22 (5.14)                                             | 57.1 (57.6)                  | 9.39 (9.33)                  |
| <b>Refinement</b>              |                              |                                                         |                              |                              |
| Resolution (Å)                 |                              | 39.6 – 2.30<br>(2.36 – 2.30)                            | 39.2 – 2.95<br>(3.03 – 2.95) | 37.9 – 2.10<br>(2.15 – 2.10) |
| No. reflections                |                              | 121199                                                  | 68023                        | 22444                        |
| <i>R</i> <sub>work</sub>       |                              | 0.21 (0.35)                                             | 0.17 (0.32)                  | 0.24 (0.35)                  |
| <i>R</i> <sub>free</sub>       |                              | 0.26 (0.39)                                             | 0.19 (0.35)                  | 0.25 (0.34)                  |
| <b>PDB code</b>                |                              | 5OVS                                                    | 5OVT                         | 5OVU                         |

**Table S1.** Data collection and refinement statistics. Highest resolution shells are shown in parenthesis.

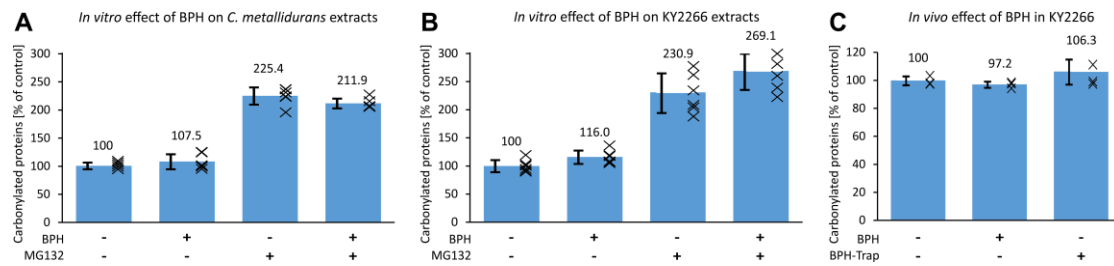

**Figure S1. Effect of BPH on the levels of carbonylated proteins under oxidative stress.**

*A, B* *C. metallidurans* (*A*) or *E. coli* KY2266 ( $\Delta lon$ ,  $\Delta hslVU$ ,  $\Delta clpPX(1)$ ) (*B*) extracts were produced from stationary-phase cultures grown with or without the proteasome inhibitor MG132 and treated with Cm-BPH. The levels of carbonylated proteins in the extracts were quantified photometrically with 2,4-dinitrophenylhydrazine. *C*, *E. coli* KY2266 cells were transformed with an arabinose-inducible Cm-BPH gene or a Cm-BPH trap gene with mutated catalytic residues. Oxidative stress was induced by a prolonged 16 hrs stationary phase incubation, and the levels of carbonylated proteins were subsequently quantified as in *A* and *B*. The individual data points (X) and mean values  $\pm$  SD of  $n = 6$  (*A, B*) or  $n = 3$  (*C*) independent experiments are indicated.

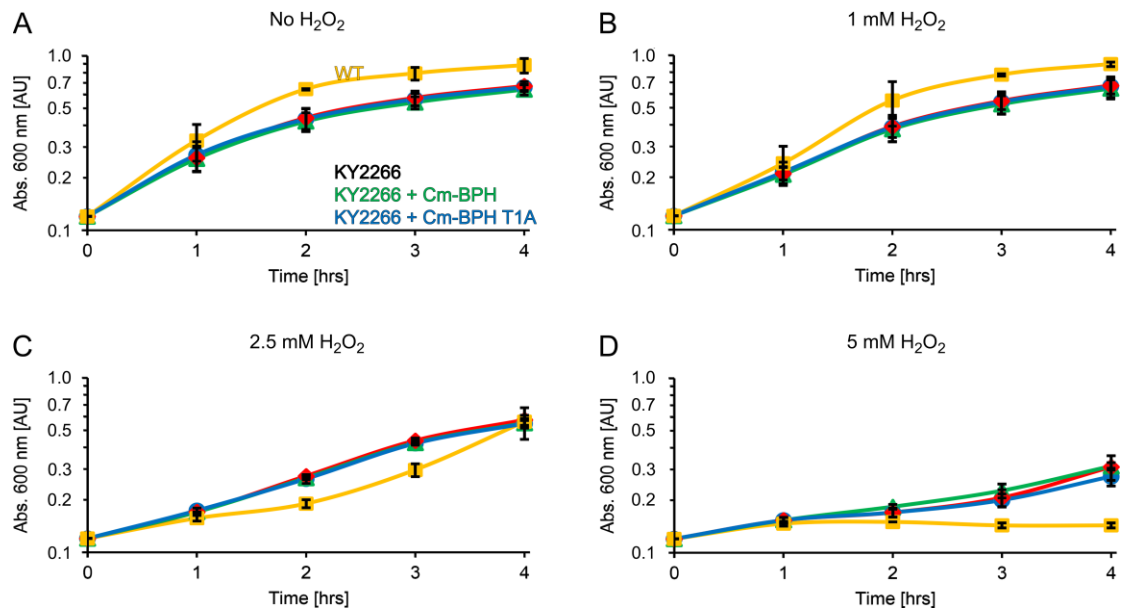

**Figure S2. Effect of BPH-expression on *E. coli* growth rates in the presence of hydrogen peroxide.** Growth curves for the wild type *E. coli* strain MC4100 or its mutant strain KY2266 ( $\Delta lon$ ,  $\Delta hslVU$ ,  $\Delta clpPX$ ) were recorded photometrically in the absence (A) or presence of 1 mM (B), 2.5 mM (C) or 5 mM (D)  $H_2O_2$  and compared to KY2266 cells expressing Cm-BPH or a Cm-BPH trap mutant (see Fig. S2C). The values are the means  $\pm$  standard deviation of  $n = 3$  independent experiments. The absence of cytosolic proteases leads to increased levels of heat shock proteins and stabilization of stress transcription factor  $\sigma^{32}$  in the mutant strain KY2266 (1), providing an explanation for its enhanced stress resistance at high peroxide concentration.

|                                                            | 10   | 20                        |
|------------------------------------------------------------|------|---------------------------|
| Alphaproteobacteria ( <i>Kiloniella litopenaei</i> )       | (M)S | IIVAVKKQGKTVIGSDSKCSDI... |
| Betaproteobacteria ( <i>Thiobacillus</i> sp. SCN 65-179)   | (M)S | TVTVVRKNGRIAIAADTLTKWG... |
| Gammaaproteobacteria ( <i>Thioploca ingrlica</i> )         | (M)S | VVVVKKQGIVCIAADTMTSFG...  |
| Deltaproteobacteria ( <i>Polyangiaceae</i> bacterium)      | (M)S | IAVAVRKGTTIAVAADSQENFG... |
| Acidobacteria ( <i>Acidobacterium</i> Mor1)                | (M)S | ILVVRKGSIAIGADTLKSHG...   |
| Chloroflexi ( <i>Chloroflexi</i> bacterium UTCFX4)         | (M)S | IIVVRKGTQACIAADSMTTWG...  |
| Firmicutes ( <i>Clostridiales</i> bacterium GWC2_40_7)     | (M)S | IIVAVKNGIAVIGADTLTKFG...  |
| Verrucomicrobia ( <i>Pedosphaera parvula</i> )             | (M)S | VVVVKKNGEVAIAADTQTTSG...  |
| Moduliflexia ( <i>Candidatus Moduliflexus flocculans</i> ) | (M)S | IIVAVQKGNDIVIAADTQDSFG... |
| Veturatruchia ( <i>Candidatus Vecturithrix</i> )           | (M)S | IIVAVHKGQELVIAADTQDSFG... |

**Figure S3. Alignment of BPH variants with Ser1 as putative catalytic residue, together with the phylogenetic classification of the respective organisms.** *Thiobacillus* sp. SCN 65-179 is the only known  $\beta$ -proteobacterial BPH variant with Ser1.

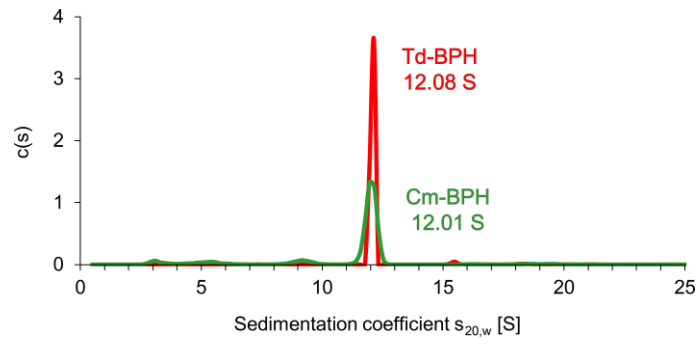

**Figure S4. Sedimentation coefficient distribution of Cm-BPH (green) and Td-BPH (red) complexes, as determined by analytical ultracentrifugation.**

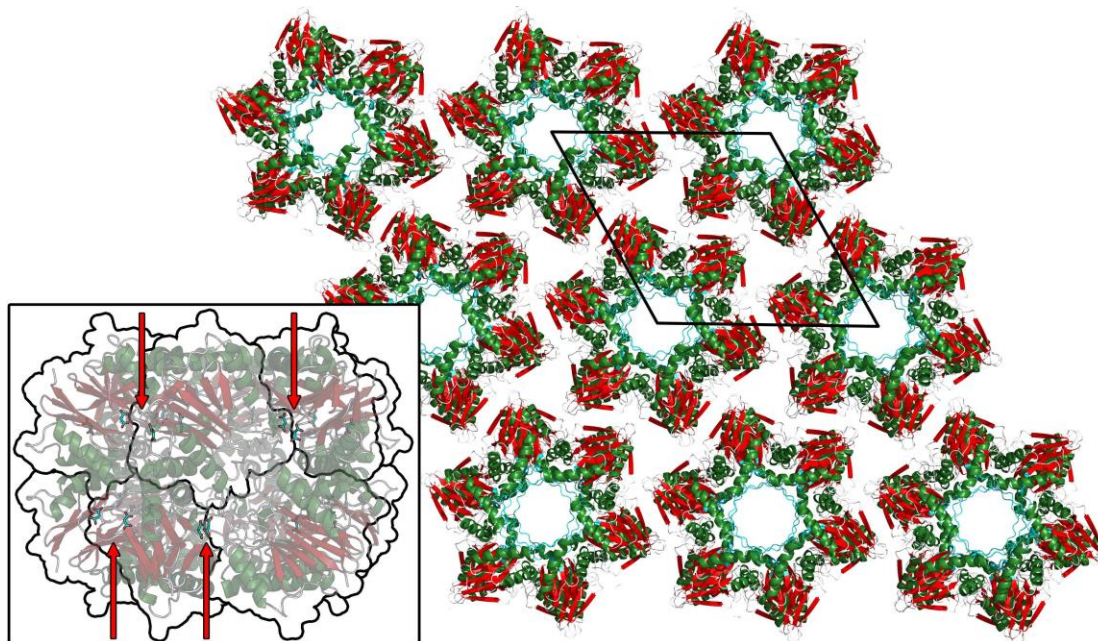

**Figure S5. The dodecameric Cm-BPH assembly is stabilized by the crystal lattice and malonate from the crystallization condition.** The dodecamers are constructed by crystallographic symmetry, the unit cell of the hexagonal lattice is indicated. This particular arrangement allows for an especially tight crystal packing, with a network of hydrogen bonds and bridging waters between the individual dodecamers. The inset shows the position of the malonate molecules (red arrows), which intercalate into the Cm-BPH inter-subunit clefts.

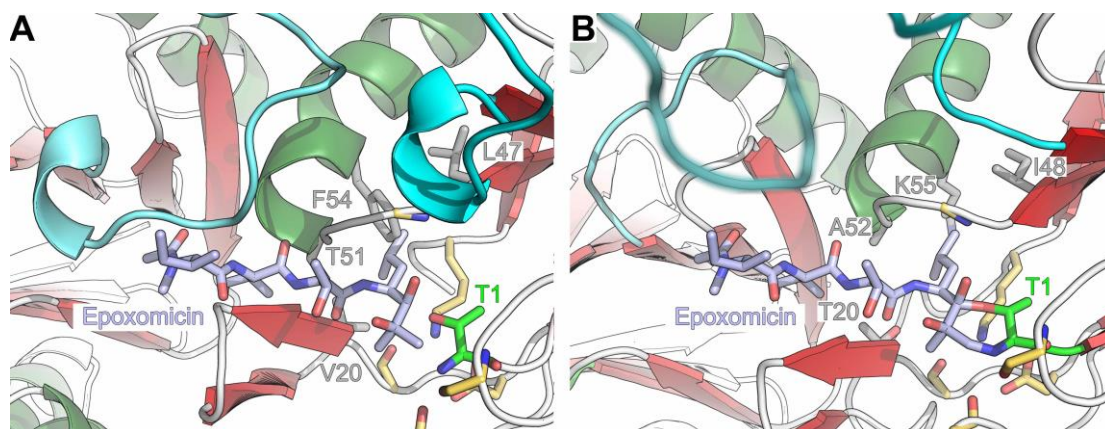

**Figure S6. Comparison of pore-loop conformations.** *A*, The Cm-BPH active site with an overlay of the epoxomicin molecule as it is bound in the Td-BPH active site. A clash between the pore loop and epoxomicin indicates that the pore loop conformation in the non-native Cm-BPH dodecamer is not compatible with substrate binding. *B*, Crystal structure of epoxomicin-conjugated Td-BPH, as depicted in Fig 5C, with a pore loop conformation permitting access to the active site.



**References**

1. Kanemori, M., Nishihara, K., Yanagi, H., and Yura, T. (1997) Synergistic roles of HslVU and other ATP-dependent proteases in controlling in vivo turnover of sigma32 and abnormal proteins in Escherichia coli. *J Bacteriol* **179**, 7219-7225
